# Supplementary material for: A preliminary study identifies early postoperative lung volume changes in patients with non-small cell lung cancer following video-assisted thoracic surgery using CT volumetry
Source: PubMed Central journal article supplement — Mol Clin Oncol. 2021 Apr 22;14(6):124. doi: 10.3892/mco.2021.2286 (PMC8082225; doi:10.3892/mco.2021.2286), 2021-04-22

Figure S1. Technical images using volumetric computed tomography. The red box indicates the preoperative volume of each lobe. Light blue indicates the RU, pink indicates the RM, green indicates the RL, cyan indicates the LU and yellow indicates the LL. RU, right upper lobe; RM, right middle lobe; RL, right lower lobe; LU, left upper lobe; LL, left lower lobe.

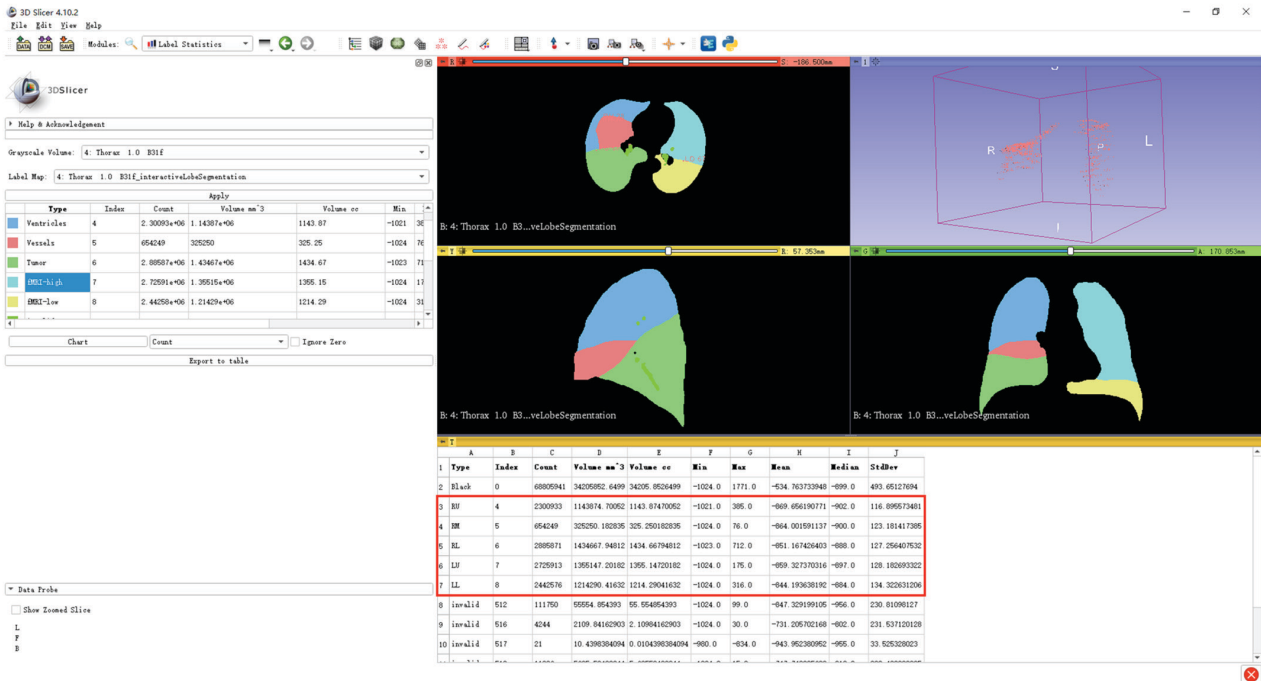

Supplement: Supplementary_Data.pdf [file Supplementary_Data.pdf]
